# Supplementary material for: Deep borehole disposal as a potential solution for high-level waste (HLW) and spent nuclear fuel (SNF) in Norway – current status and a first generic safety assessment
Source: Copernicus journal article supplement (doi:10.5194/sand-2-31-2023), 2023-09-06
Supplement: Supplementary file 1 [file sand-2-31-2023-supplement.pdf]

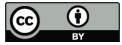

*Supplement of*

**Deep borehole disposal as a potential solution for high-level waste (HLW) and spent nuclear fuel (SNF) in Norway – current status and a first generic safety assessment**

**Hans-Joachim Engelhardt et al.**

*Correspondence to:* Tilman Fischer ([tilman.fischer@bge.de](mailto:tilman.fischer@bge.de))

The copyright of individual parts of the supplement might differ from the article licence.

# Deep Borehole Disposal as a Potential Solution for HLW/SNF in Norway – Current Status and a First Generic Safety Assessment

SafeND 2023 – SESSION 04: Activities in international research programs and collaborations

Tilman Fischer, Hans-Joachim Engelhardt, Bernt Haverkamp, Toivo Wanne, Ansgar Wunderlich

# Outline

1. General information about the Norwegian Program
2. Central aspects of the DBD development
  - General concept development
  - Disposal canister design
  - Sealing of disposal borehole
  - TRL assessment
3. Safety assessment

# Radioactive Waste in Norway

- Responsible organization →  **NND**  
NORSK NUKLEÆR DEKOMMISJONERING
- No commercial reactors, limited waste volume
- Radioactive waste from various industries and research reactors
- Disposal plan is to locate all necessary repository types at a single site:
  - Landfill-type repository for VLLW
  - Intermediate-depth repository for LILW
  - HLW either in DGR-type (similar to Finland and Sweden) or Deep Borehole Disposal

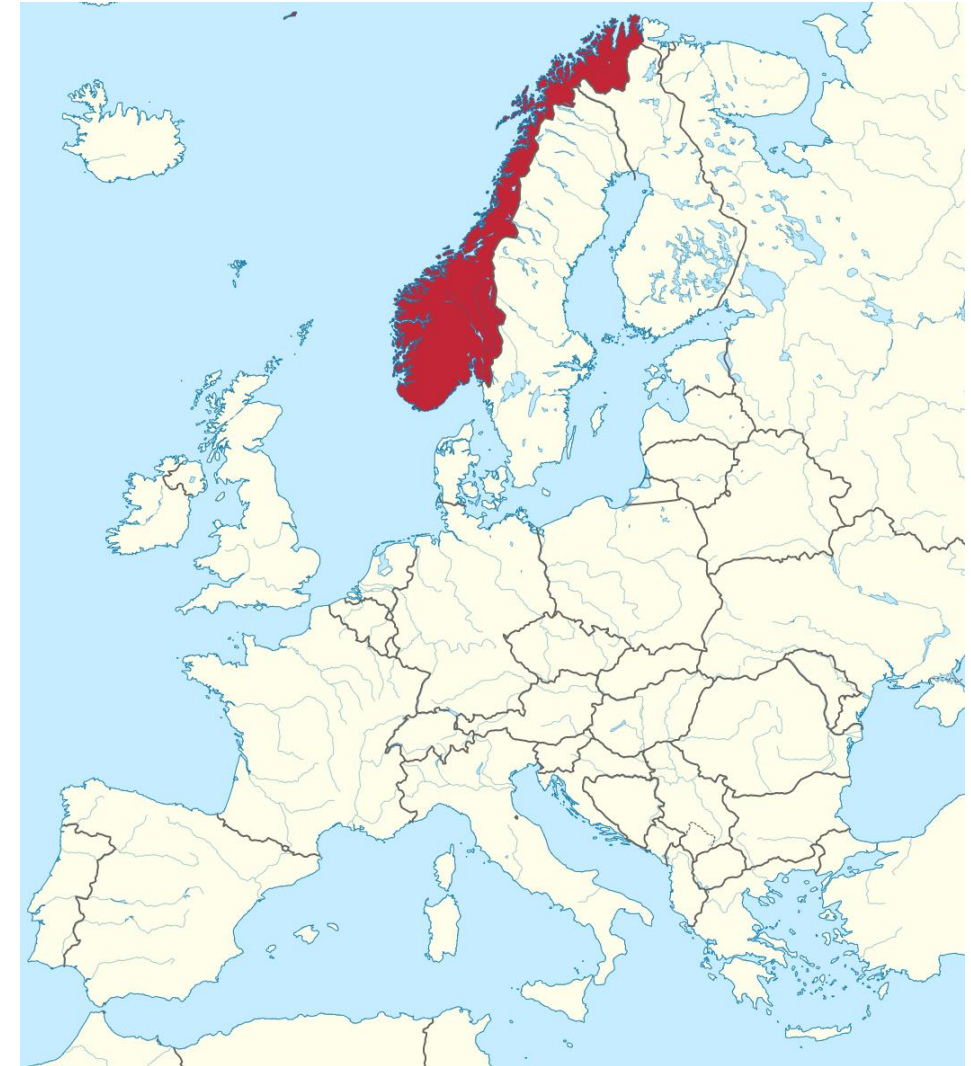

# General Concept Development

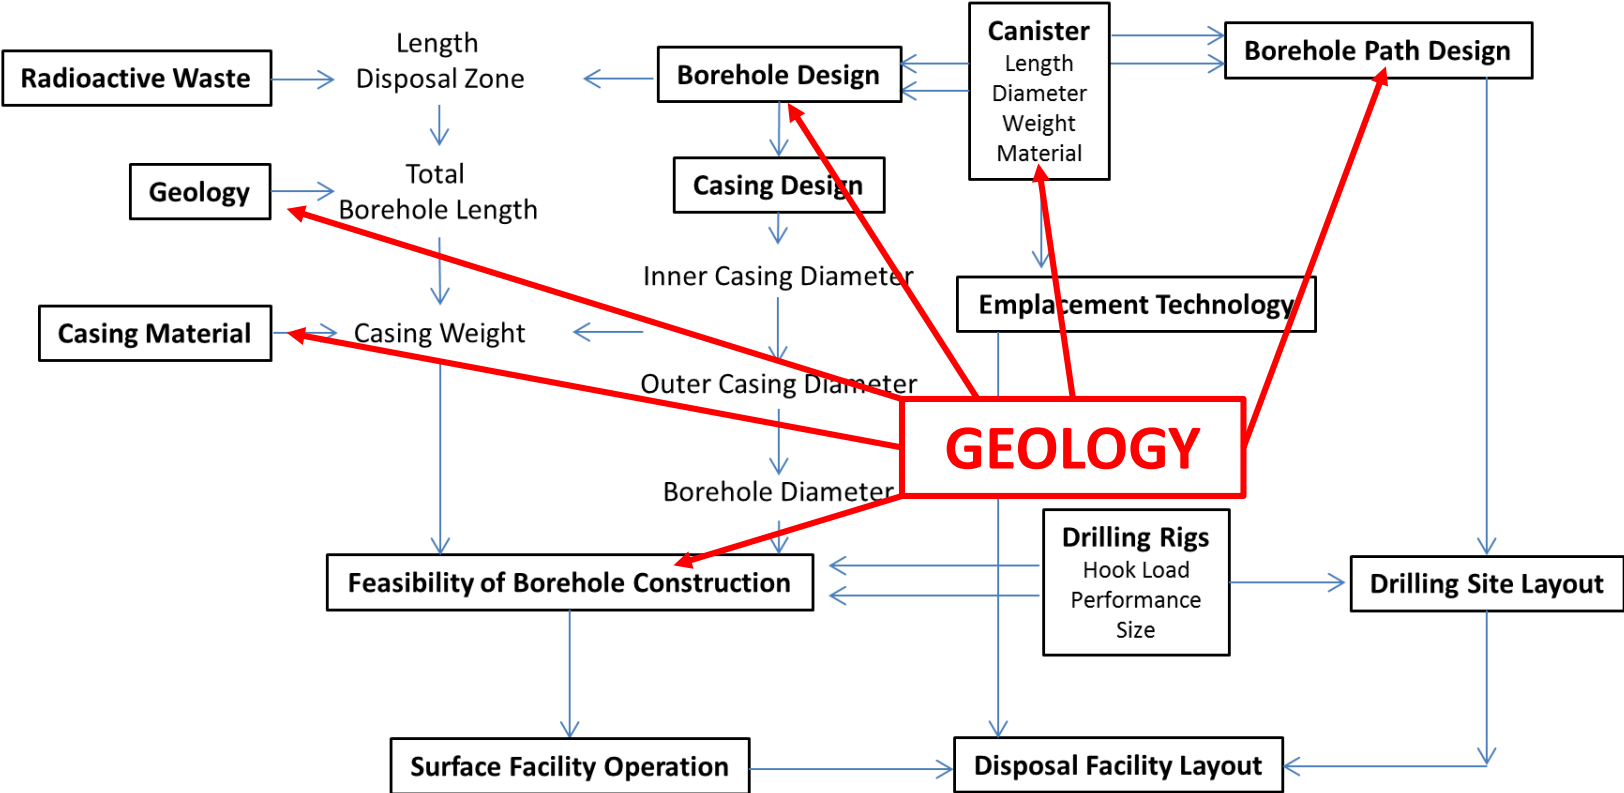

# General Concept Development

- Roughly 70 canisters (DBC-R) for the disposal of all Norwegian HLW/SNF in deep boreholes

- Considered canister dimensions:
  - Outer length: 5 000 mm
  - Inner length: 4 800 mm
  - Outer diameter: ~ 525 mm
  - Inner diameter: 435 mm

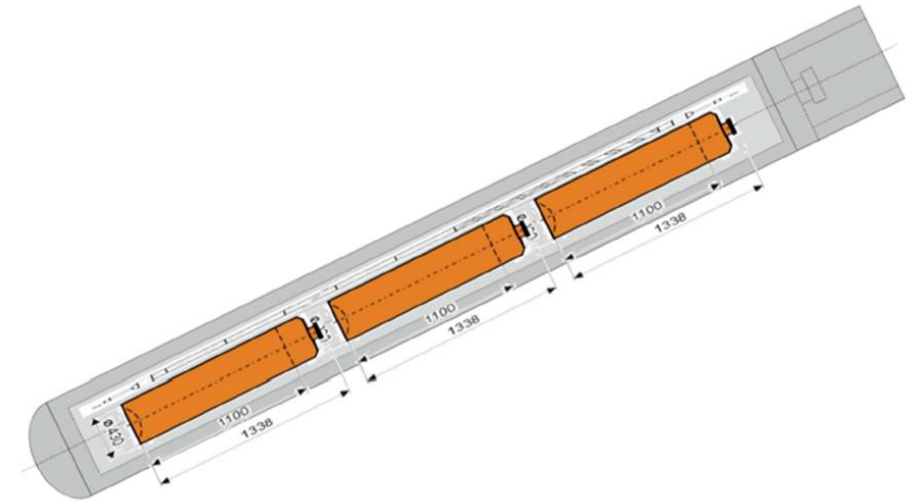

DBC-R container with three assemblies and one fuel rod

from: Bracke, G., Charlier, F., Liebscher, A., Schilling, F., Röckel, T. (2017): About the Possibility of Disposal of HLRW in Deep Boreholes in Germany. Geosciences, 7, 3.

- Resulting (preliminary) borehole dimensions:
  - Considered borehole depth: 3 500 m
  - Required disposal length: 500 m
  - Required inner casing diameter (at final depth): 600 mm

# General Concept Development

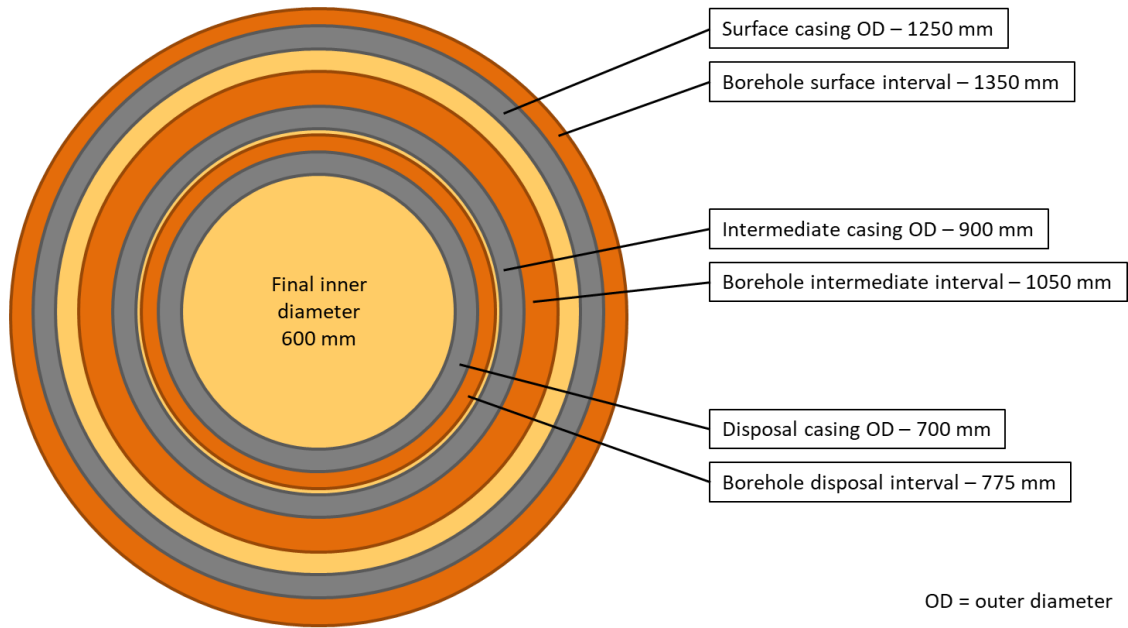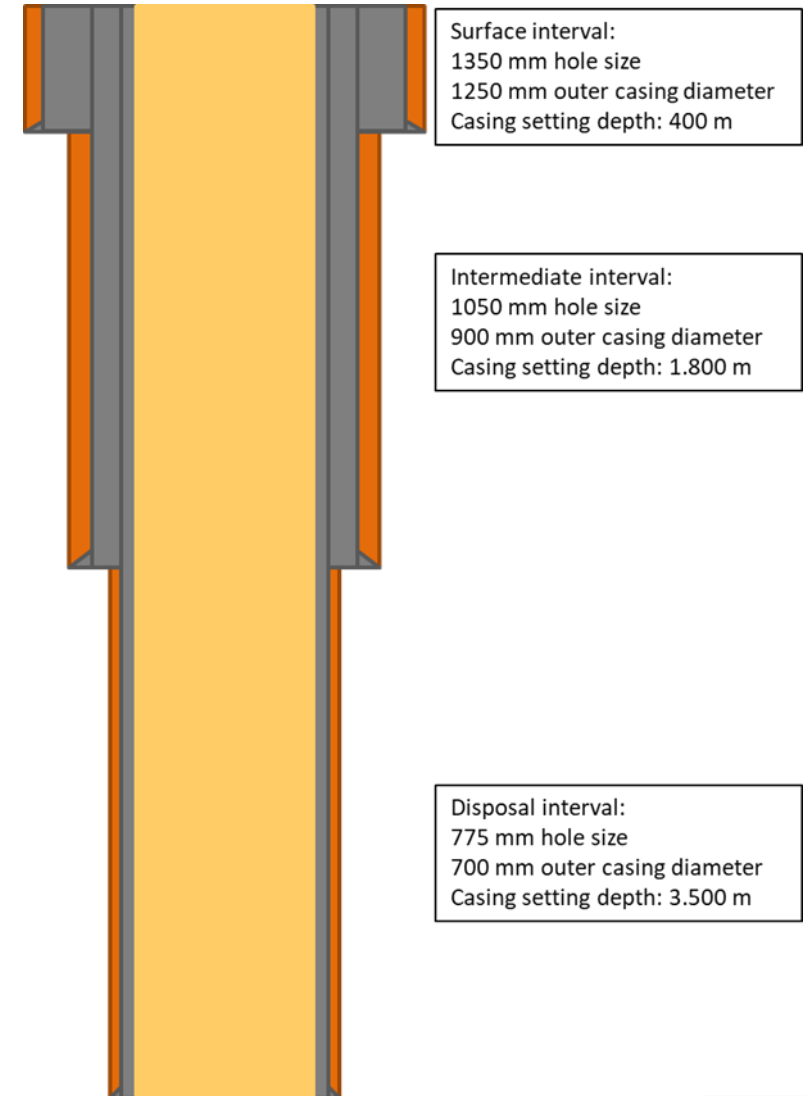

- Resulting borehole dimensions:
- Considered borehole depth: 3 500 m
  - Required disposal length: 500 m
  - Required inner casing diameter (at final depth): 600 mm

# Disposal Canister Design

## Safety functions:

For a radioactive waste canister, in general three major safety functions can be identified:

- **Containment** of the radioactive waste, e.g. as defined in IAEA SSR-5
- **Shielding** of the radiation, e.g. as defined in IAEA SSG-1
- **Absence of criticality**, e.g. as defined in IAEA SSG-15

Additional design- and concept-specific safety functions:

- **Limiting temperature** of the radioactive waste, e.g. as named in IAEA SSG-15
- **Limiting corrosion** and gas production, e.g. as named in IAEA SSR-5
- **Operability**, e.g. as named in IAEA SSG-1

## Quantified Safety Functions

### Physical design parameters:

- Canister is designed for all waste types
- Dimensions restricted by maximum lengths and diameters of fuel assemblies and waste packages from reprocessing

## Physical dimension requirements of the canister

Analysis of potential materials and their benefits and limitations

Analysis of material availabilities

Analysis of potential manufacturing techniques

### Manufacturing techniques:

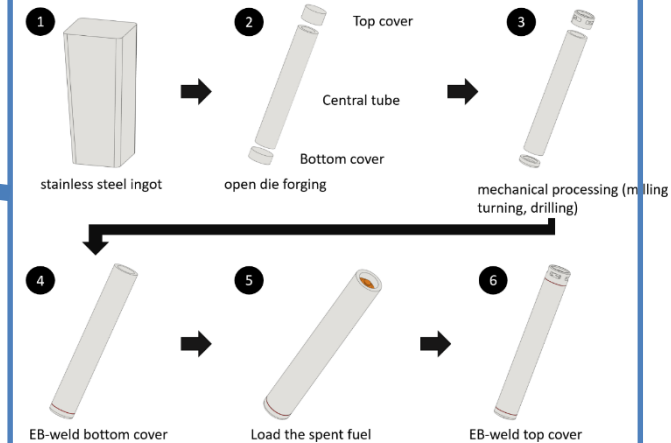

# Canister Design



# Disposal Canister Design

Canister design for the HLW in Norway:

- Length about 4.4 meters
- Usable inner length ~3.7 meters
- Diameter 60 cm
- Material: Stainless steel
  
- Weight of empty canister ~4500 kg
- Weight with waste ~6000 kg
  
- For Norwegian HLW inventory, a total of 90 canisters are needed for a single disposal borehole

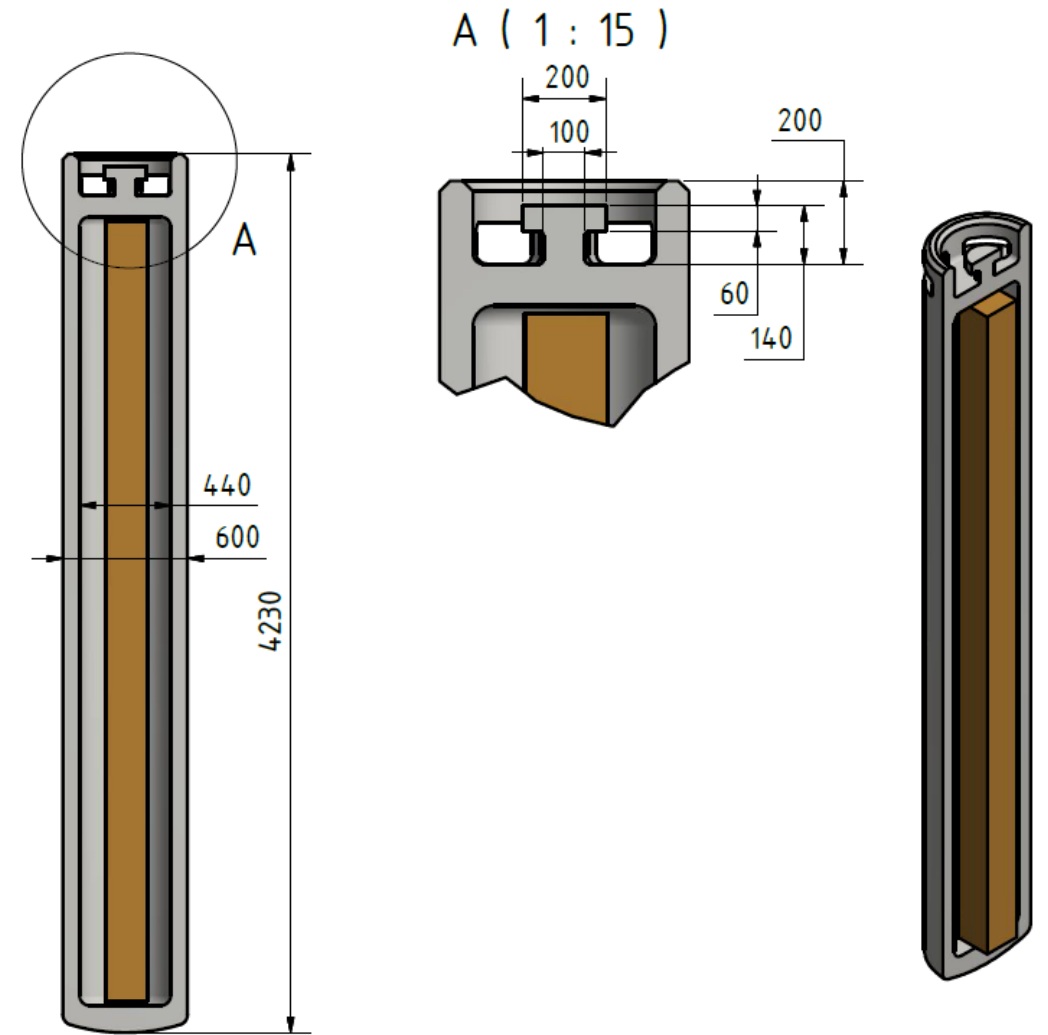

# Sealing of a Disposal Borehole

1. Gather information about the geology
    - Detailed information about formation sequences
    - Gamma ray-neutron logs
    - Investigation of cuttings and cores during drilling
    - Borehole pressure tests to identify potential fractures in the formation
    - Seismic surveys to detect faults
  2. Gather information about the borehole condition
    - Completion of the borehole
    - Condition of the borehole walls
    - Prepare the borehole for installation of the sealing elements
  3. Select material based on the geological/geochemical information
  4. Select emplacement method based on the material selection
  5. Determine the exact position of the sealing elements
- The main objective is to create a seal that mimics the formation!

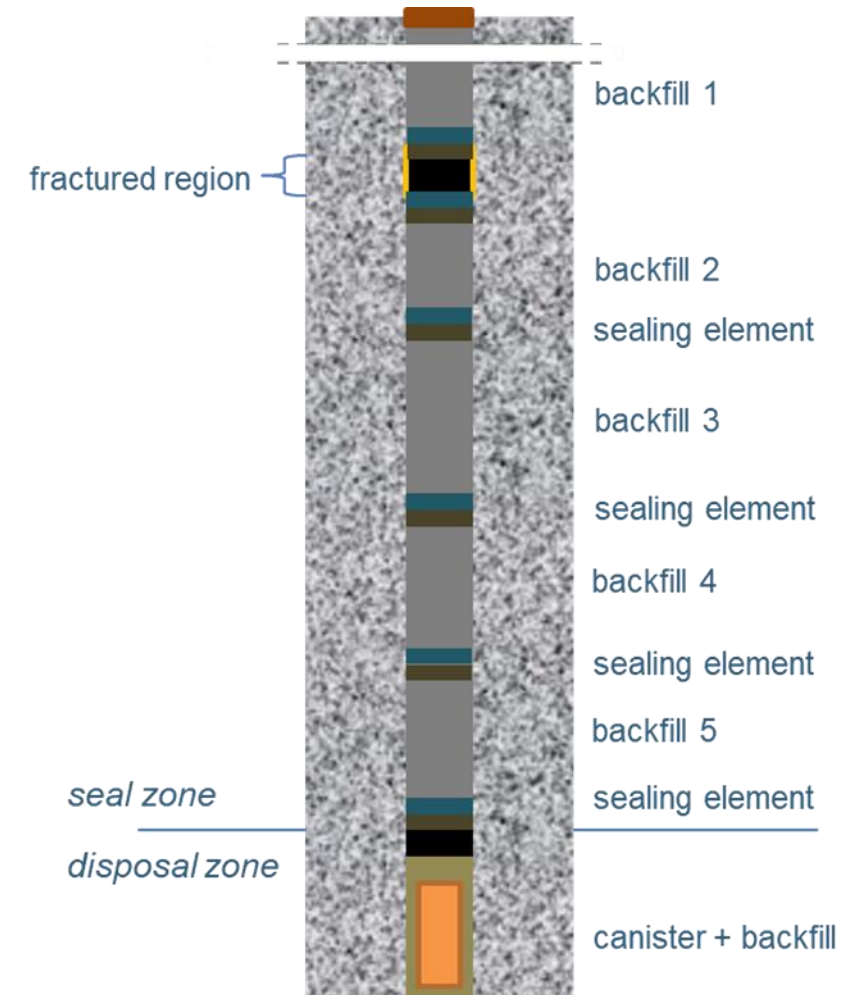

# TRL Assessment

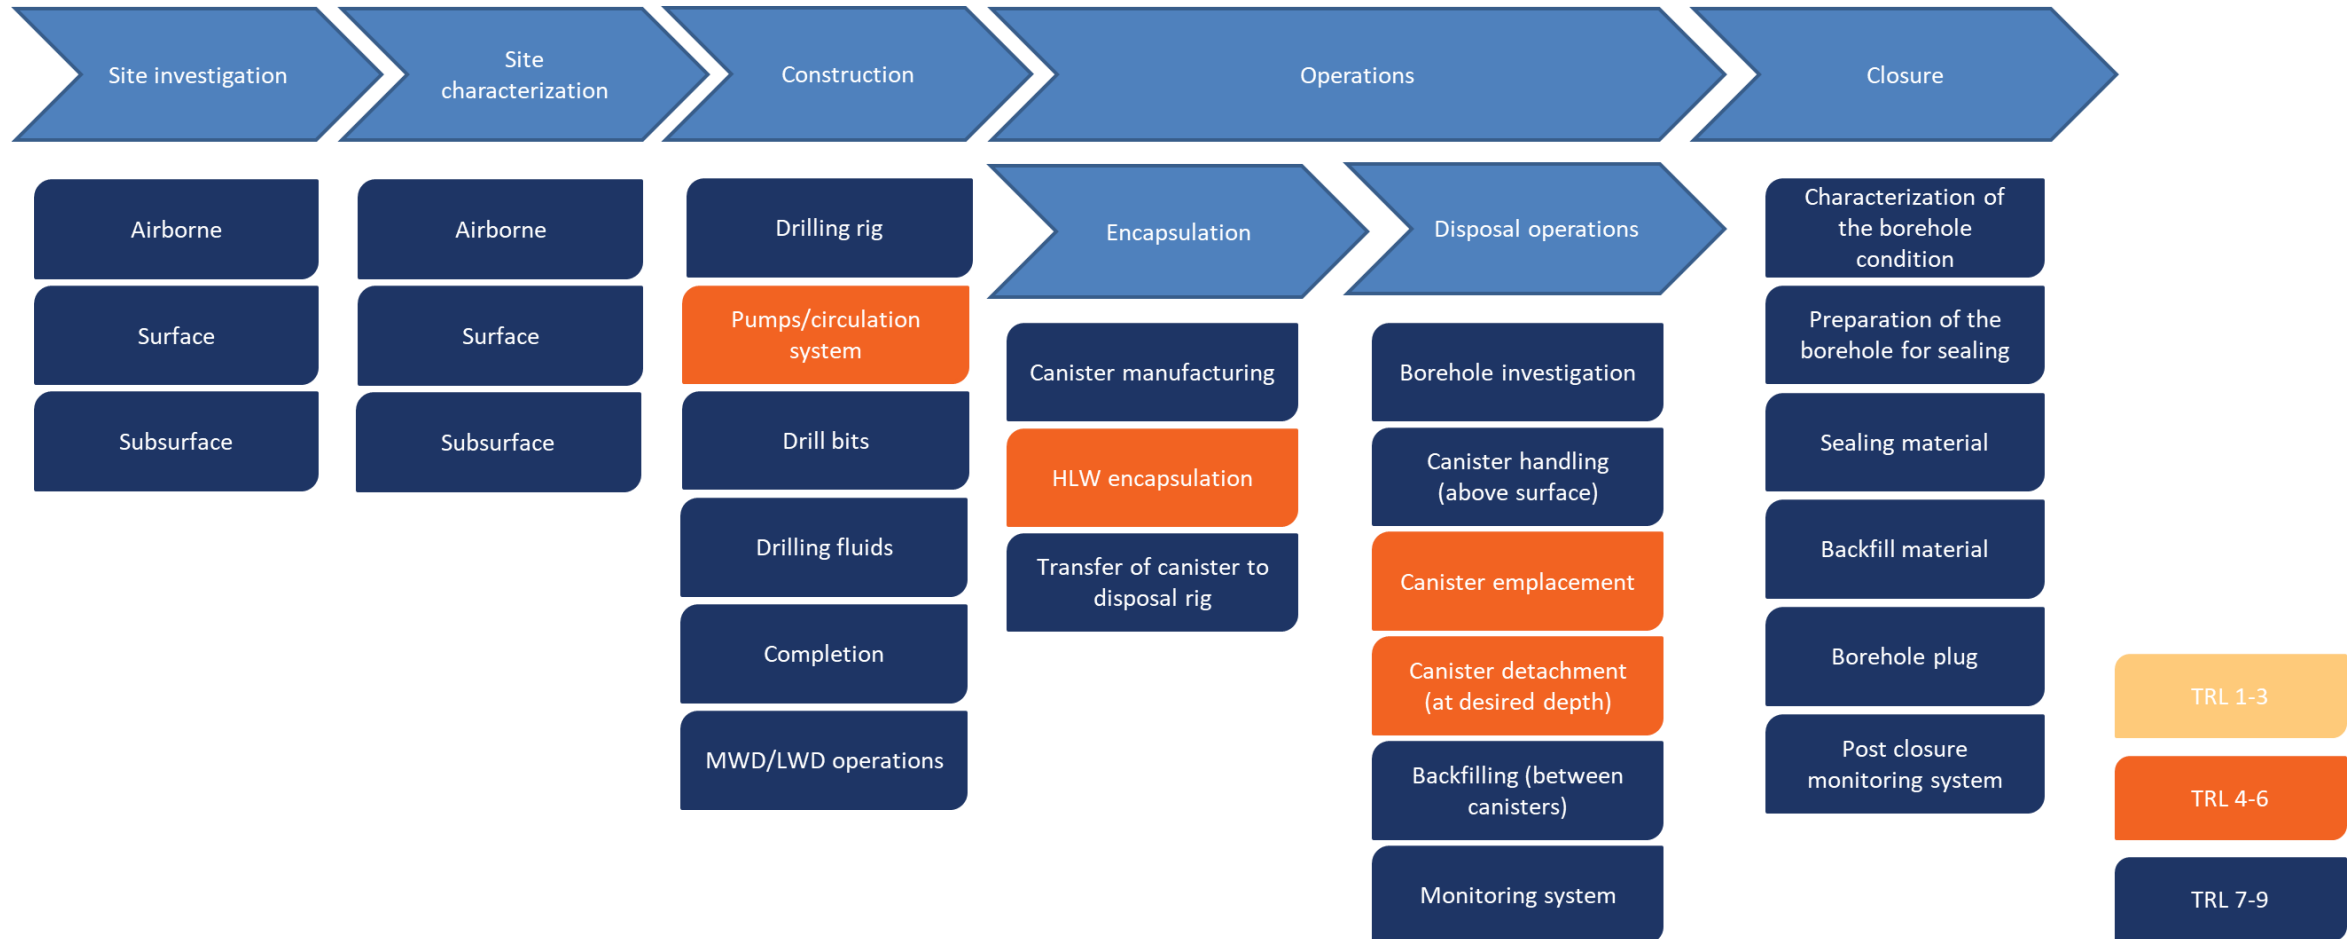

➤ Identification of aspects with the most R&D need

# TRL Assessment

- Findings of the first TRL assessment:
  1. Site investigation/identification capabilities are available and applied on a daily basis
  2. Drilling capabilities are in principle available and have proven their usability, however, the “required” dimensions have not/barely been drilled so far
    - When looking at the technical feasibility, availability of the technologies, and statements from drilling engineers, a borehole with the “required” dimensions can be drilled
    - The “right” components need to be put together
  3. Encapsulation plant, canisters, and emplacement device need to be developed
  
- In principle, all technologies are available and usable, but there is still a need for research to implement the DBD concept.

# Safety Assessment

## General information for the safety assessment

- Borehole assumptions:
  - Backfill zone length: 2,500 m (backfill material is a crushed rock mixture)
  - Sealing zone length: 500 m (seal consists of bentonite)
  - Disposal zone length: 460 m (88 canisters + 1 m bentonite buffer between the canisters)
- Canisters will fail, once thickness of canister walls has corroded from 80 mm initial thickness to 50 mm
- Calculations carried out with GoldSim

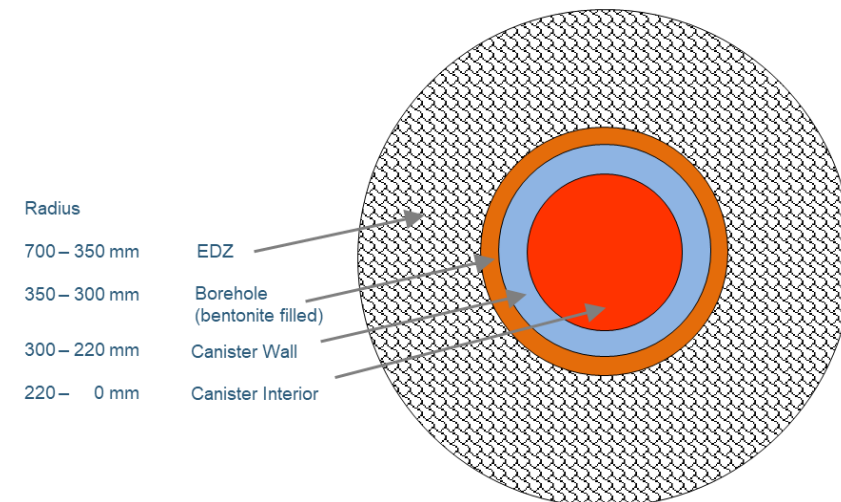

# Safety Assessment

- Sealing zone has been divided into 25 segments  
→ Each segment represents a 20-m-section
- Disposal zone has been divided into 22 segments  
→ Each segment represents 4 canisters (21 m)
- Backfilling zone has been divided into 25 segments  
→ Each segment represents a 100-m-section

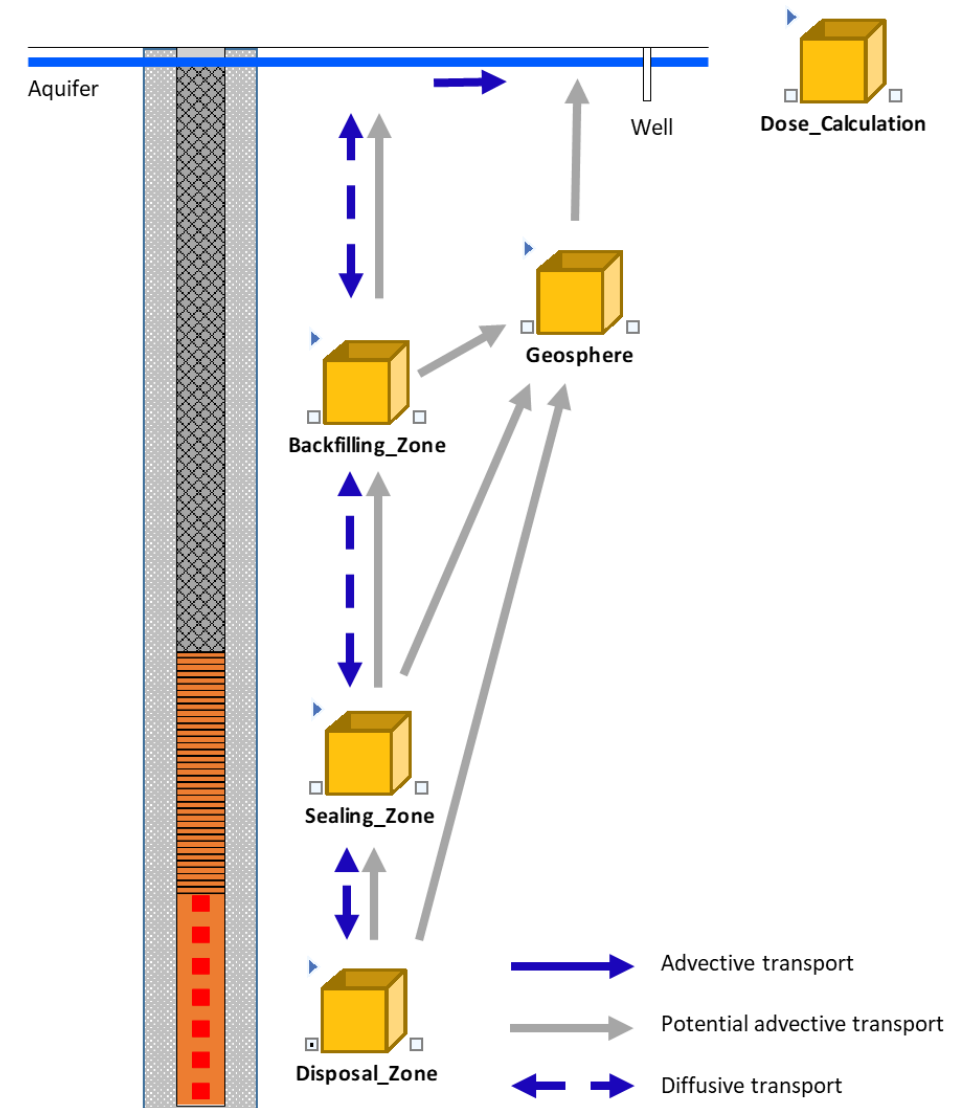

# Safety Assessment – SC-1

## Reference scenario - Normal Evolution Scenario – SC-1

- Only diffusive transport through the borehole and the damaged rock zone
- Advective transport through the groundwater aquifer to a water well

## Results:

- Sorbing radionuclides or those with relatively short half-lives do not reach the top of the seal
- Even non-sorbing radionuclides hardly reach the backfilling zone and the aquifer

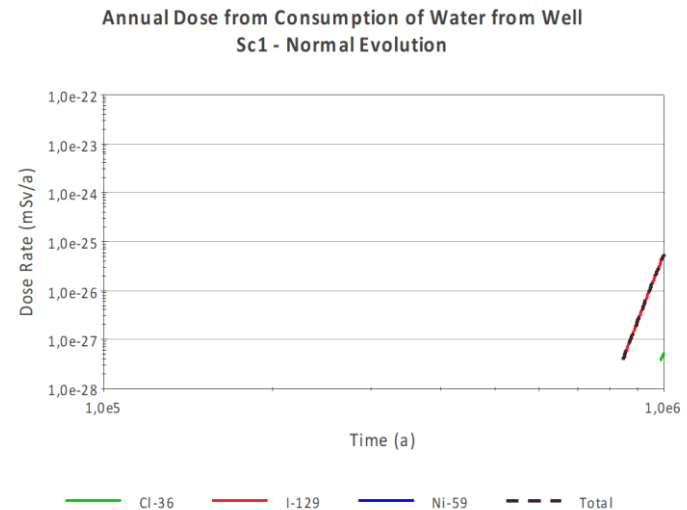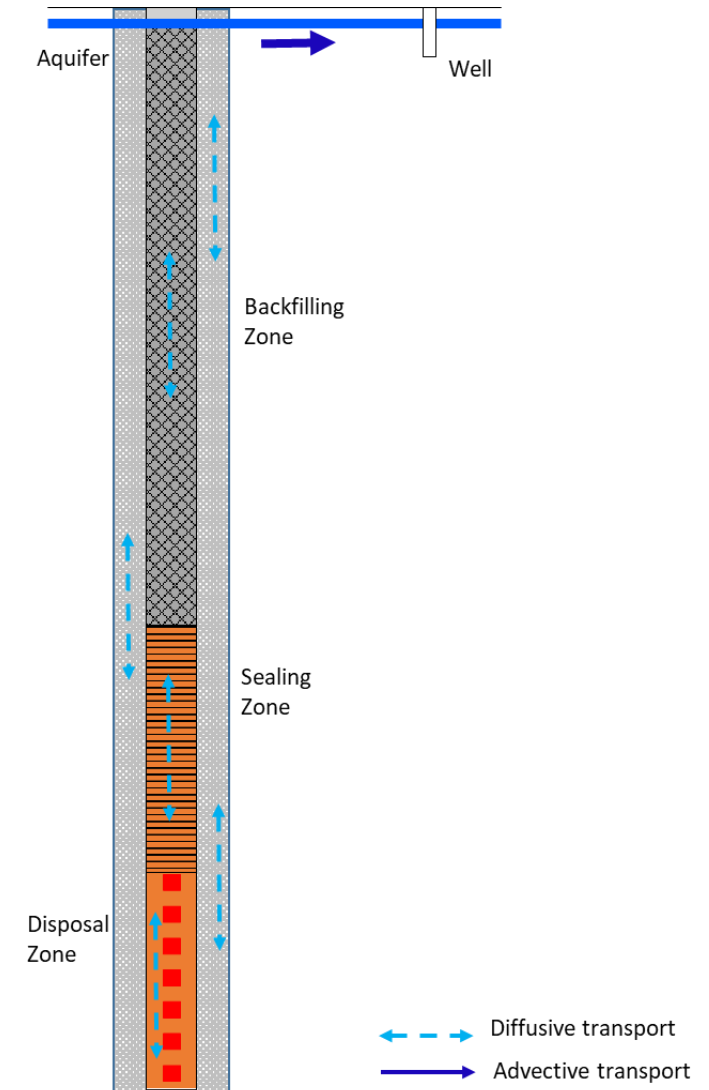

# Safety Assessment – SC-2

## Alternative scenario – Vertical Flow – SC-2

- Flow through the borehole and the damaged rock zone
- Different sub-scenarios considered
  - No solubility limits
  - No sorption
  - Direct failure of all canisters

### Results:

- Compared with SC-1, the total dose rate is larger → advective transport is much more efficient than diffusive transport
- Total dose rate is higher
- Dose rate is still well below the assumed regulatory limit (0.1 mSv/a) even for the pessimistic scenarios

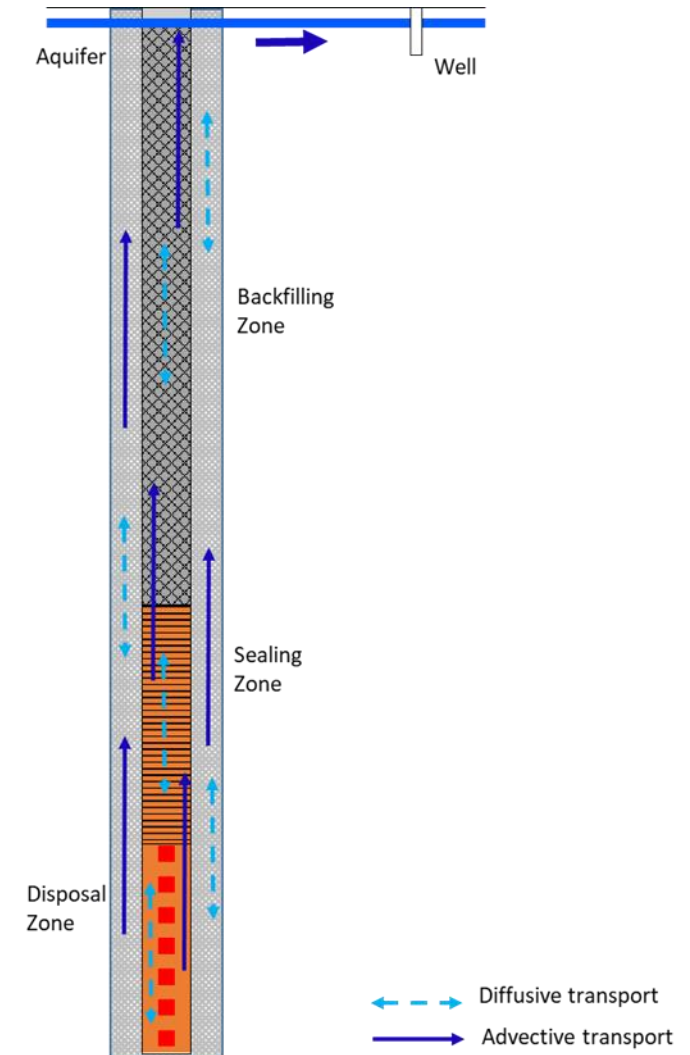



# Safety Assessment – SC-3

## Alternative scenario – Fracture – SC-3

- Flow through fractures
- Intersection of borehole by a highly transmissive fracture
- Fractures at different locations (depths) of the borehole considered:
  1. Bottom/middle/top of the disposal zone
  2. Middle of the sealing zone
  3. Bottom of the backfilling zone

## Results:

- Dose rate depends strongly on the location of the fracture
- Higher dose rate than before, especially for fractures through the disposal zone, but still below the regulatory limits

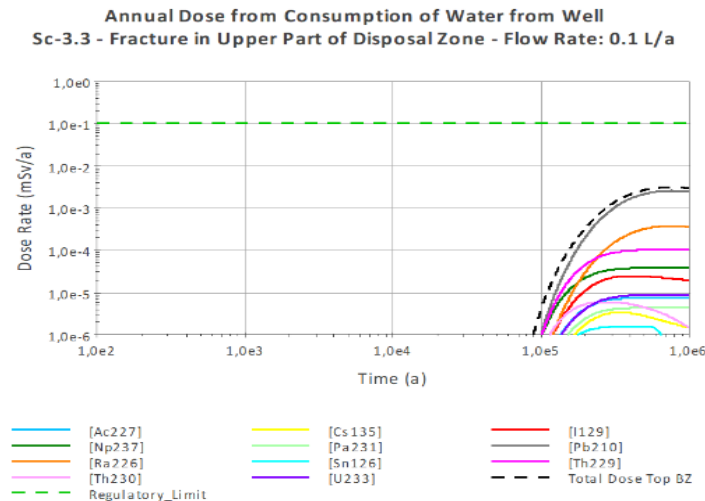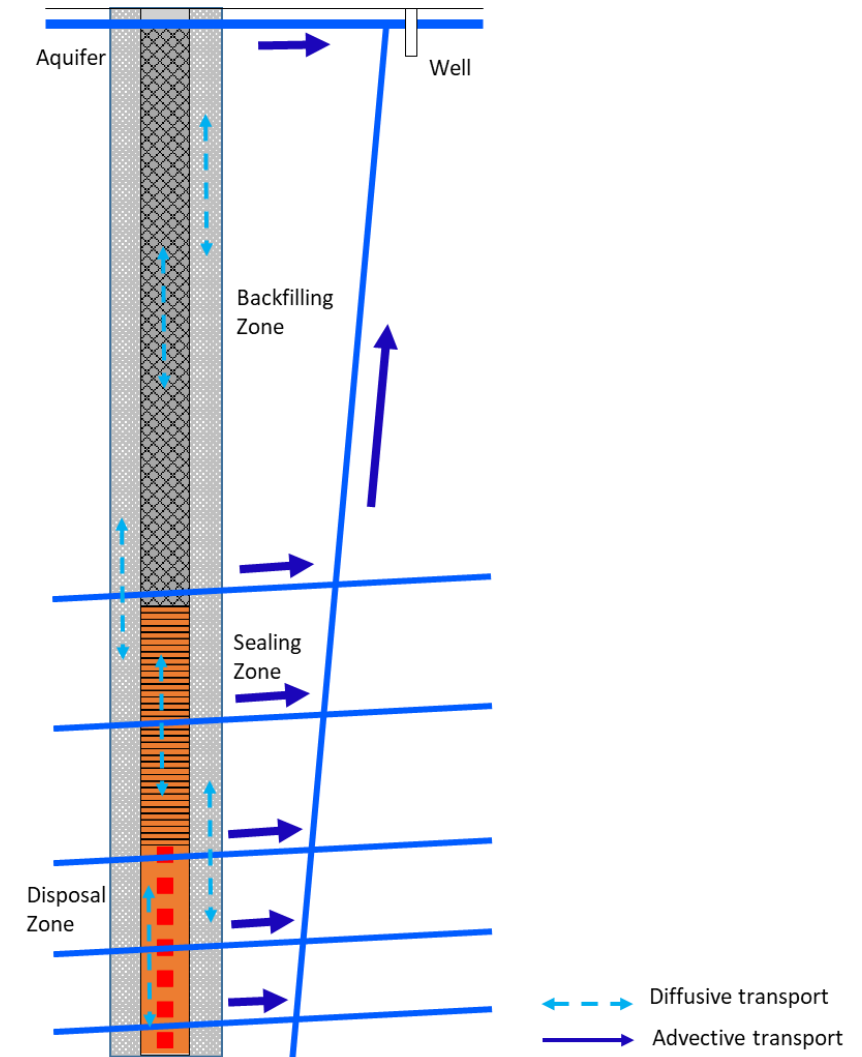

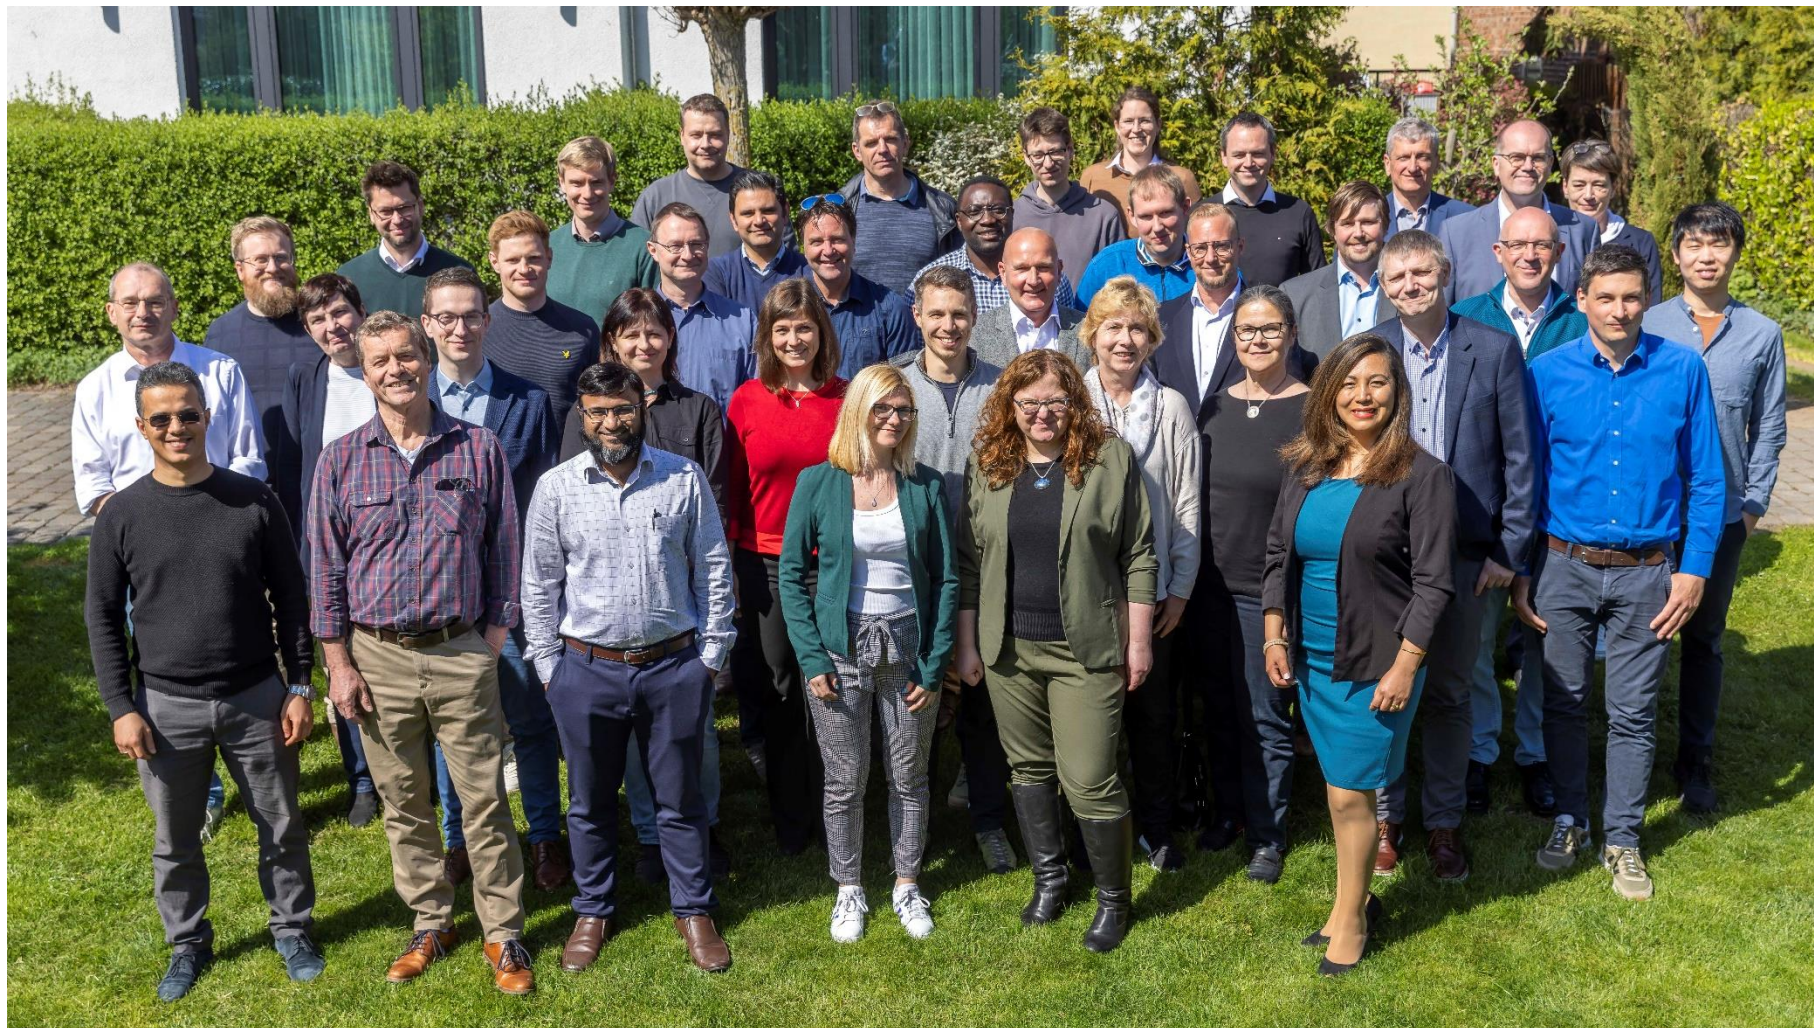

Thank you for your attention!
